# Supplementary material
Source: PubMed Central journal article supplement (PMC6218248)
Supplement: NIHMS1504249-supplement-1.pdf [file NIHMS1504249-supplement-1.pdf]

## Supporting Information: Correlated Motions of C'–N and C<sub>α</sub>–C<sub>β</sub> pairs in Protonated and Per-deuterated GB3.

Liliya Vugmeyster<sup>a,\*</sup>, Aaron Griffin<sup>a</sup>, Dmitry Ostrovsky<sup>b</sup>, Shibani Bhattacharya<sup>c</sup>, Parker J. Nichols<sup>d</sup>, C. James McKnight<sup>e</sup>, Beat Vögeli<sup>d</sup>.

<sup>a</sup> Department of Chemistry, University of Colorado at Denver, Denver, CO 80204

<sup>b</sup> Department of Mathematics, University of Colorado at Denver, Denver, CO 80204

<sup>c</sup> New York Structural Biology Center, New York, NY 10027

<sup>d</sup> Department of Biochemistry and Molecular Genetics, University of Colorado, School of Medicine, Anschutz Medical Campus, Aurora, CO, 80045

<sup>e</sup> Department of Physiology and Biophysics, Boston University School of Medicine, Boston, MA, 02118

\* corresponding author: [LILIYA.VUGMEYSTER@UCDENVER.EDU](mailto:LILIYA.VUGMEYSTER@UCDENVER.EDU); 1201 Larimer Street, Denver Colorado, 80204

### SI1. Effect of fast motion order parameters.

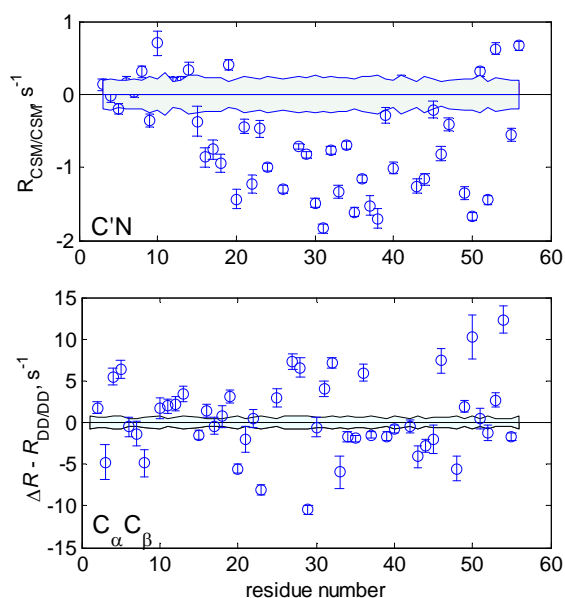

**Figure S1. Top:**  $R_{CSM/CSM}$  vs residue number for the C'–N experiment for the protonated sample at 500 MHz. The zero line sets reference to  $R_{CSA/CSA}$  and  $R_{DD/DD}$  contributions with all order parameters of 0.8, as in Figure 4 of the main text. The aqua-colored bands represent *alternative*  $R_{CSA/CSA}$  and  $R_{DD/DD}$  contributions within the order parameter range of 0.7–0.9. **Bottom:**  $\Delta R - R_{DD/DD}$  vs residue number for the C<sub>α</sub>–C<sub>β</sub> experiment for the protonated sample at 500 MHz. The zero line sets reference to  $R_{DD/DD}$  contributions calculated as in Figure 4 of the main text: A value of 0.8 was used for all dipolar interactions except for those involving H<sub>β</sub> or D<sub>β</sub>, for which a value of 0.5 was used. The aqua-colored band represents *alternative*  $R_{DD/DD}$  contributions within the following order parameter ranges: 0.7–0.9 for all dipolar interactions except for those involving H<sub>β</sub> or D<sub>β</sub>, for which a range of 0.3–0.7 is used.

## SI2. Expressions for calculations of the $R_{CSA/CSA}$ term.

The following equation was used to calculate  $R_{CSA/CSA}$  rates for two anisotropic  $\sigma^C$  and  $\sigma^N$  CSA tensors:

$$R_{CSA/CSA} = \left(\frac{2}{18}\right) B_0^2 \gamma_N \gamma_C \frac{8}{5} \tau_c \times \left\{ \left[ \sigma_{xx}^C - \sigma_{zz}^C \right] \left[ \sigma_{xx}^N - \sigma_{zz}^N \right] P_2(\cos(\beta_C + 180^\circ - \alpha + \beta_N)) \right. \\ + \left[ \sigma_{xx}^C - \sigma_{zz}^C \right] \left[ \sigma_{yy}^N - \sigma_{zz}^N \right] P_2(\cos 90^\circ) \\ + \left[ \sigma_{yy}^C - \sigma_{zz}^C \right] \left[ \sigma_{xx}^N - \sigma_{zz}^N \right] P_2(\cos(180^\circ - \alpha + \beta_N - (90^\circ - \beta_C))) \\ \left. + \left[ \sigma_{yy}^C - \sigma_{zz}^C \right] \left[ \sigma_{yy}^N - \sigma_{zz}^N \right] P_2(\cos 90^\circ) \right\} S_{CSA/CSA}^2$$

where  $\alpha$  is the  $C'_{i-1}N_iH^N$  angle,  $\beta_N$  is the angle between  $\sigma_{xx}^N$  (the longest component of the  $^{15}N$  CSA tensor) and the N-H bond,  $\beta_C$  is the angle between  $\sigma_{xx}^C$  and the C'-N bond,  $\sigma_{zz}^C$  and  $\sigma_{yy}^N$  are directed perpendicular to the peptide plane. The reference frame is defined in detail in Figure 1 of Loth *et al.* (Loth *et al.* 2005). The principal components are defined so that  $\sigma_{xx} > \sigma_{yy} > \sigma_{zz}$ .

In the case of  $C_\alpha C_\beta$ , the tensors were assumed to be axially symmetric with the components  $\Delta\sigma_{C_\alpha}$  and  $\Delta\sigma_{C_\beta}$ :

$$R_{CSA/CSA} = \frac{8}{45} (B_0 \gamma_C)^2 \Delta\sigma_{C_\alpha} \Delta\sigma_{C_\beta} P_2(\cos \theta_{C_\alpha, C_\beta}) S_{CSA/CSA}^2$$

where  $\theta_{C_\alpha, C_\beta}$  is the angle between the symmetry axes of the two CSA tensors.

## SI3. C' chemical shift assignments for GB3.

Performed on protonated GB3 using HNC0 experiment at 500 MHz and 25 °C.

| Residue # | C' Shift | Residue # | C' Shift |
|-----------|----------|-----------|----------|
| 2         | 174.36   | 29        | 181.64   |
| 3         | 174.78   | 30        | 178.43   |
| 4         | 172.88   | 31        | 179.51   |
| 5         | 174.66   | 32        | 177.16   |
| 6         | 174.41   | 33        | 178.92   |
| 7         | 175.17   | 34        | 171.26   |
| 8         | 175.02   | 35        | 179.33   |
| 9         | 173.29   | 36        | 177.15   |
| 10        | 178.43   | 37        | 174.07   |
| 11        | 173.82   | 38        | 174.29   |
| 12        | 173.62   | 39        | 174.09   |
| 13        | 176.34   | 40        | 174.64   |
| 14        | 179.39   | 41        | 171.84   |

|    |        |    |        |
|----|--------|----|--------|
| 15 | 175.53 | 42 | 176.71 |
| 16 | 172.18 | 43 | 177.00 |
| 17 | 173.91 | 44 | 172.78 |
| 18 | 171.22 | 45 | 173.25 |
| 19 | 175.91 | 46 | 174.54 |
| 20 | 177.43 | 47 | 178.11 |
| 21 | 174.97 | 48 | 179.94 |
| 22 | 174.82 | 49 | 175.27 |
| 23 | 179.41 | 50 | 175.05 |
| 24 | 177.07 | 51 | 174.96 |
| 25 | 177.01 | 52 | 174.44 |
| 26 | 179.27 | 53 | 176.71 |
| 27 | 177.75 | 54 | 172.62 |
| 28 | 179.59 | 55 | 175.97 |

### SI4. Contributions of $R_{DD/DD}$ and $R_{CSA/CSA}$ into $\Delta R$ values.

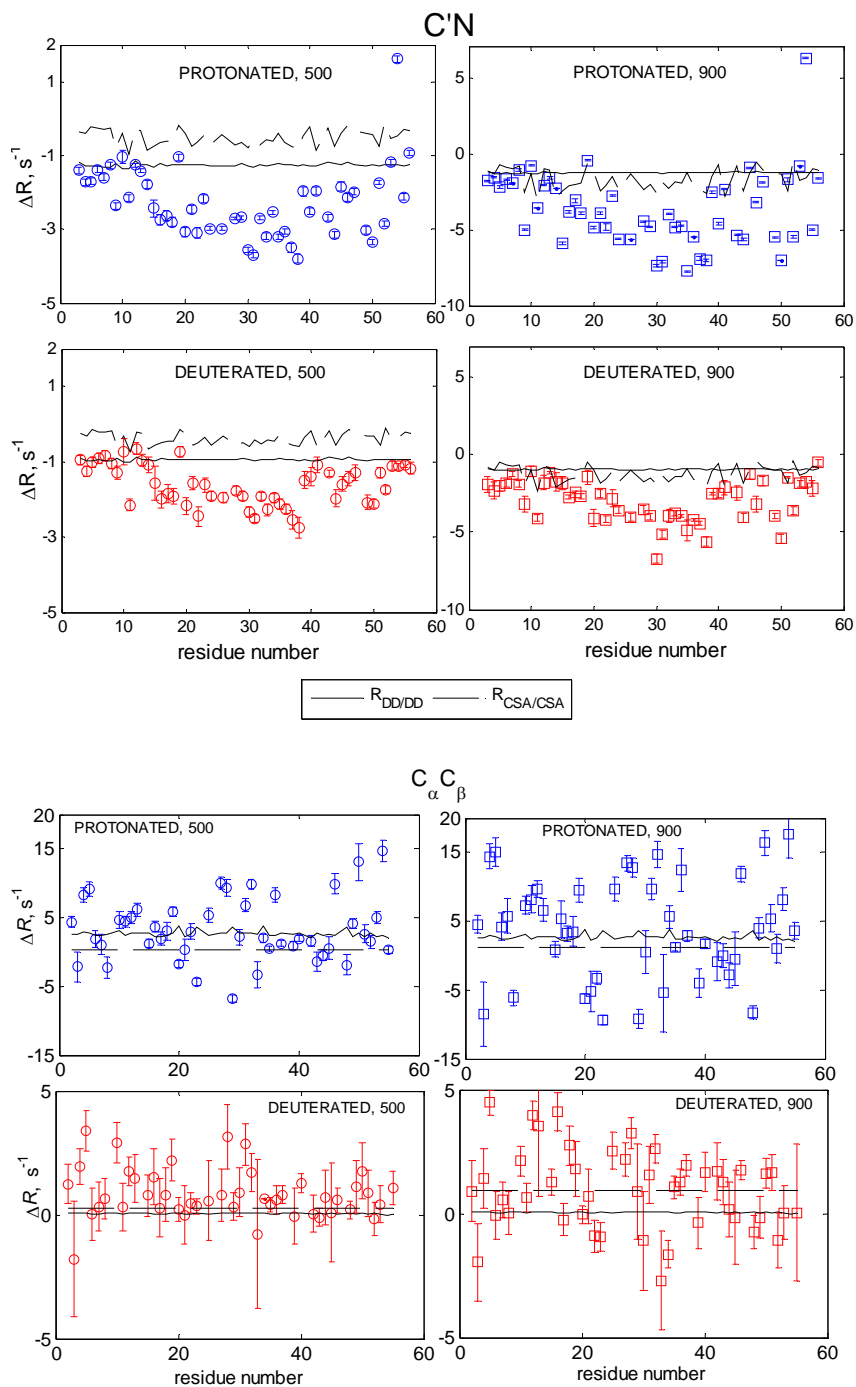

**Figure SI2.** Contributions of  $R_{DD/DD}$  (solid lines) and  $R_{CSA/CSA}$  (dotted lines) into  $\Delta R$  values versus residue number. Top panels: C'N measurements. Bottom panels, C $_{\alpha}$ C $_{\beta}$  measurements.  $R_{CSA/CSA}$  values for C $_{\alpha}$ C $_{\beta}$  measurements are shown as half the maximum values stated in main text.

## SI5. Experimental values of $\Delta R$ rates and J-coupling constants

### C'N 500 (numbering on amide)

| Residue# | $\Delta R, s^{-1}$ |       | $R_{DD/DD} + R_{CSA/CSA}, s^{-1}$ | $\Delta R, s^{-1}$ |       | $R_{DD/DD} + R_{CSA/CSA}, s^{-1}$ |
|----------|--------------------|-------|-----------------------------------|--------------------|-------|-----------------------------------|
|          | protonated         | error |                                   | deuterated         | error |                                   |
| 3        | -1.40              | 0.08  | -1.54                             | -0.96              | 0.04  | -1.22                             |
| 4        | -1.72              | 0.08  | -1.71                             | -1.26              | 0.04  | -1.33                             |
| 5        | -1.70              | 0.07  | -1.50                             | -1.01              | 0.05  | -1.12                             |
| 6        | -1.38              | 0.07  | -1.54                             | -0.92              | 0.05  | -1.15                             |
| 7        | -1.59              | 0.08  | -1.62                             | -0.84              | 0.04  | -1.22                             |
| 8        | -1.27              | 0.08  | -1.58                             | -1.04              | 0.05  | -1.20                             |
| 9        | -2.37              | 0.09  | -2.02                             | -1.29              | 0.06  | -1.64                             |
| 10       | -1.04              | 0.17  | -1.74                             | -0.72              | 0.11  | -1.35                             |
| 11       | -2.16              | 0.07  | -2.33                             | -2.14              | 0.05  | -1.88                             |
| 12       | -1.27              | 0.06  | -1.43                             | -0.65              | 0.06  | -1.11                             |
| 13       | -1.41              | 0.06  | -1.59                             | -0.97              | 0.05  | -1.22                             |
| 14       | -1.78              | 0.10  | -2.12                             | -1.09              | 0.07  | -1.75                             |
| 15       | -2.44              | 0.20  | -2.08                             | -1.57              | 0.15  | -1.67                             |
| 16       | -2.74              | 0.13  | -1.88                             | -2.00              | 0.08  | -1.52                             |
| 17       | -2.64              | 0.12  | -1.89                             | -1.85              | 0.08  | -1.50                             |
| 18       | -2.80              | 0.12  | -1.86                             | -1.91              | 0.07  | -1.49                             |
| 19       | -1.05              | 0.07  | -1.45                             | -0.74              | 0.05  | -1.11                             |
| 20       | -3.08              | 0.13  | -1.64                             | -2.18              | 0.07  | -1.29                             |
| 21       | -2.45              | 0.10  | -2.01                             | -1.57              | 0.06  | -1.61                             |
| 22       | -3.11              | 0.13  | -1.88                             | -2.45              | 0.09  | -1.54                             |
| 23       | -2.17              | 0.11  | -1.70                             | -1.61              | 0.06  | -1.34                             |
| 24       | -3.00              | 0.05  | -2.00                             | -1.90              | 0.04  | -1.63                             |
| 26       | -2.99              | 0.05  | -1.70                             | -1.95              | 0.05  | -1.32                             |
| 28       | -2.72              | 0.04  | -2.00                             | -1.78              | 0.04  | -1.62                             |
| 29       | -2.69              | 0.04  | -1.86                             | -1.90              | 0.04  | -1.51                             |
| 30       | -3.56              | 0.06  | -2.07                             | -2.33              | 0.04  | -1.70                             |
| 31       | -3.72              | 0.07  | -1.88                             | -2.51              | 0.03  | -1.49                             |
| 32       | -2.71              | 0.05  | -1.94                             | -1.93              | 0.03  | -1.59                             |
| 33       | -3.19              | 0.09  | -1.86                             | -2.28              | 0.05  | -1.48                             |
| 34       | -2.55              | 0.05  | -1.85                             | -1.96              | 0.04  | -1.49                             |
| 35       | -3.23              | 0.07  | -1.61                             | -2.11              | 0.05  | -1.28                             |
| 36       | -3.06              | 0.06  | -1.90                             | -2.26              | 0.04  | -1.56                             |
| 37       | -3.51              | 0.13  | -1.98                             | -2.55              | 0.08  | -1.64                             |
| 38       | -3.79              | 0.13  | -2.09                             | -2.76              | 0.10  | -1.72                             |
| 39       | -1.97              | 0.11  | -1.69                             | -1.49              | 0.08  | -1.36                             |
| 40       | -2.52              | 0.08  | -1.51                             | -1.40              | 0.08  | -1.16                             |
| 41       | -1.96              | 0.10  | -2.13                             | -1.09              | 0.07  | -1.75                             |
| 43       | -2.69              | 0.09  | -1.44                             | -1.30              | 0.03  | -1.11                             |

|    |       |      |       |       |      |       |
|----|-------|------|-------|-------|------|-------|
| 44 | -3.14 | 0.09 | -1.98 | -1.98 | 0.07 | -1.63 |
| 45 | -1.84 | 0.11 | -1.63 | -1.59 | 0.06 | -1.29 |
| 46 | -2.14 | 0.10 | -1.33 | -1.44 | 0.06 | -1.04 |
| 47 | -2.00 | 0.08 | -1.58 | -1.30 | 0.07 | -1.25 |
| 49 | -3.04 | 0.09 | -1.68 | -2.08 | 0.06 | -1.32 |
| 50 | -3.34 | 0.05 | -1.67 | -2.11 | 0.04 | -1.32 |
| 51 | -1.73 | 0.06 | -2.04 | -1.29 | 0.05 | -1.67 |
| 52 | -2.84 | 0.06 | -1.39 | -1.74 | 0.04 | -1.05 |
| 53 | -1.19 | 0.07 | -1.82 | -1.11 | 0.04 | -1.45 |
| 54 | 1.61  | 0.09 | -1.74 | -1.13 | 0.03 | -1.36 |
| 55 | -2.13 | 0.09 | -1.57 | -1.07 | 0.03 | -1.20 |
| 56 | -0.92 | 0.06 | -1.59 | -1.17 | 0.05 | -1.20 |

**C'N 900 (numbering on amide)**

| Residue# | $\Delta R, s^{-1}$ |       | $R_{DD/DD} +$         |            | $\Delta R, s^{-1}$ |                       | $R_{DD/DD} +$ |  |
|----------|--------------------|-------|-----------------------|------------|--------------------|-----------------------|---------------|--|
|          | protonated         | error | $R_{CSA/CSA}, s^{-1}$ | deuterated | error              | $R_{CSA/CSA}, s^{-1}$ |               |  |
| 3        | -1.78              | 0.03  | -2.32                 | -1.93      | 0.50               | -1.56                 |               |  |
| 4        | -1.56              | 0.04  | -2.64                 | -2.30      | 0.53               | -1.76                 |               |  |
| 5        | -2.20              | 0.09  | -1.97                 | -2.05      | 0.34               | -1.24                 |               |  |
| 6        | -1.71              | 0.05  | -2.14                 | -1.83      | 0.27               | -1.36                 |               |  |
| 7        | -1.92              | 0.03  | -2.31                 | -1.26      | 0.19               | -1.48                 |               |  |
| 8        | -1.07              | 0.09  | -2.15                 | -1.89      | 0.23               | -1.39                 |               |  |
| 9        | -5.01              | 0.06  | -3.78                 | -3.20      | 0.49               | -2.62                 |               |  |
| 10       | -0.77              | 0.05  | -2.64                 | -1.08      | 0.37               | -1.74                 |               |  |
| 11       | -3.57              | 0.03  | -4.49                 | -4.10      | 0.23               | -3.11                 |               |  |
| 12       | -2.07              | 0.05  | -2.09                 | -1.82      | 0.46               | -1.38                 |               |  |
| 13       | -1.59              | 0.06  | -2.33                 | -1.14      | 0.07               | -1.53                 |               |  |
| 14       | -2.28              | 0.03  | -4.08                 | -1.78      | 0.60               | -2.86                 |               |  |
| 15       | -5.87              | 0.08  | -5.32                 | -1.85      | 0.40               | -2.60                 |               |  |
| 16       | -3.80              | 0.09  | -3.32                 | -2.73      | 0.11               | -2.29                 |               |  |
| 17       | -3.09              | 0.10  | -3.26                 | -2.41      | 0.10               | -2.23                 |               |  |
| 18       | -3.95              | 0.10  | -3.20                 | -2.69      | 0.15               | -2.18                 |               |  |
| 19       | -0.43              | 0.04  | -1.90                 | -1.42      | 0.47               | -1.21                 |               |  |
| 20       | -4.82              | 0.09  | -2.53                 | -4.10      | 0.53               | -1.69                 |               |  |
| 21       | -3.93              | 0.08  | -3.68                 | -2.51      | 0.22               | -2.53                 |               |  |
| 22       | -4.83              | 0.20  | -3.31                 | -4.18      | 0.22               | -2.30                 |               |  |
| 23       | -2.79              | 0.04  | -2.72                 | -2.82      | 0.53               | -1.82                 |               |  |
| 24       | -5.61              | 0.06  | -3.63                 | -3.60      | 0.21               | -2.51                 |               |  |
| 26       | -5.64              | 0.03  | -2.64                 | -4.03      | 0.24               | -1.76                 |               |  |
| 28       | -4.47              | 0.03  | -3.64                 | -3.53      | 0.30               | -2.51                 |               |  |
| 29       | -4.80              | 0.06  | -3.27                 | -3.99      | 0.23               | -2.26                 |               |  |
| 30       | -7.35              | 0.07  | -3.86                 | -6.71      | 0.26               | -2.69                 |               |  |
| 31       | -7.10              | 0.06  | -3.13                 | -5.15      | 0.28               | -2.12                 |               |  |

|    |       |      |       |       |      |       |
|----|-------|------|-------|-------|------|-------|
| 32 | -3.96 | 0.02 | -3.52 | -3.95 | 0.40 | -2.45 |
| 33 | -4.82 | 0.03 | -3.15 | -3.81 | 0.17 | -2.15 |
| 34 | -4.75 | 0.06 | -3.18 | -3.92 | 0.09 | -2.18 |
| 35 | -7.73 | 0.04 | -4.03 | -4.89 | 0.67 | -1.66 |
| 36 | -5.47 | 0.03 | -3.36 | -4.21 | 0.05 | -2.33 |
| 37 | -6.90 | 0.15 | -3.63 | -4.44 | 0.12 | -2.54 |
| 38 | -7.01 | 0.11 | -3.91 | -5.60 | 0.30 | -2.73 |
| 39 | -2.52 | 0.08 | -2.70 | -2.55 | 0.08 | -1.84 |
| 40 | -4.62 | 0.08 | -2.03 | -2.49 | 0.31 | -1.31 |
| 41 | -2.33 | 0.05 | -4.03 | -2.11 | 0.46 | -2.81 |
| 43 | -5.37 | 0.05 | -2.00 | -2.46 | 0.45 | -1.30 |
| 44 | -5.67 | 0.09 | -3.66 | -4.06 | 0.32 | -2.56 |
| 45 | -0.93 | 0.07 | -2.50 | -1.24 | 0.35 | -1.67 |
| 46 | -3.21 | 0.04 | -1.71 | -3.17 | 0.52 | -1.11 |
| 47 | -1.88 | 0.06 | -2.32 | -1.71 | 0.34 | -1.55 |
| 49 | -5.50 | 0.05 | -2.58 | -3.95 | 0.18 | -1.72 |
| 50 | -7.03 | 0.01 | -2.61 | -5.41 | 0.28 | -1.75 |
| 51 | -1.70 | 0.10 | -3.76 | -1.47 | 0.06 | -2.61 |
| 52 | -5.46 | 0.06 | -1.73 | -3.61 | 0.22 | -1.08 |
| 53 | -0.81 | 0.04 | -3.04 | -1.87 | 0.20 | -2.07 |
| 54 | 6.30  | 0.07 | -2.82 | -1.77 | 0.38 | -1.89 |
| 55 | -5.01 | 0.03 | -2.24 | -2.17 | 0.50 | -1.45 |
| 56 | -1.62 | 0.05 | -2.35 | -0.52 | 0.21 | -1.52 |

### $C_{\alpha}C_{\beta}$ 500 (numbering on $C_{\alpha}$ )

| Residue# | $\Delta R, s^{-1}$ |       | $R_{DD/DD}, s^{-1}$ |            | $\Delta R, s^{-1}$ |            | $R_{DD/DD}, s^{-1}$ |            |
|----------|--------------------|-------|---------------------|------------|--------------------|------------|---------------------|------------|
|          | protonated         | error | protonated          | deuterated | error              | deuterated | error               | deuterated |
| 2        | 4.36               | 0.74  | 2.60                | 1.25       | 0.81               | 0.05       |                     |            |
| 3        | -2.14              | 2.13  | 2.65                | -1.80      | 2.33               | 0.05       |                     |            |
| 4        | 8.38               | 1.03  | 2.89                | 1.94       | 0.73               | 0.05       |                     |            |
| 5        | 9.18               | 1.08  | 2.78                | 3.39       | 0.80               | 0.05       |                     |            |
| 6        | 1.93               | 1.20  | 2.47                | 0.03       | 1.07               | 0.05       |                     |            |
| 7        | 1.11               | 1.52  | 2.43                | 0.32       | 0.99               | 0.05       |                     |            |
| 8        | -2.28              | 1.60  | 2.57                | 0.65       | 0.80               | 0.05       |                     |            |
| 10       | 4.71               | 1.24  | 3.04                | 2.92       | 0.82               | 0.06       |                     |            |
| 11       | 4.41               | 0.83  | 2.46                | 0.31       | 0.95               | 0.05       |                     |            |
| 12       | 5.01               | 0.87  | 2.76                | 1.75       | 0.56               | 0.05       |                     |            |
| 13       | 6.15               | 0.94  | 2.69                | 1.48       | 0.96               | 0.05       |                     |            |
| 15       | 1.27               | 0.55  | 2.77                | 0.77       | 0.84               | 0.05       |                     |            |
| 16       | 3.67               | 0.82  | 2.26                | 1.53       | 1.12               | 0.04       |                     |            |
| 17       | 1.90               | 0.95  | 2.30                | 0.28       | 1.18               | 0.04       |                     |            |
| 18       | 3.06               | 1.26  | 2.35                | 0.81       | 1.08               | 0.04       |                     |            |

|    |       |      |      |       |      |      |
|----|-------|------|------|-------|------|------|
| 19 | 5.84  | 0.74 | 2.74 | 2.19  | 0.84 | 0.05 |
| 20 | -1.78 | 0.54 | 3.80 | 0.22  | 0.50 | 0.07 |
| 21 | 0.30  | 1.60 | 2.29 | 0.00  | 1.17 | 0.04 |
| 22 | 3.01  | 1.05 | 2.52 | 0.47  | 0.41 | 0.05 |
| 23 | -4.37 | 0.55 | 3.71 | 0.34  | 0.31 | 0.07 |
| 25 | 5.39  | 1.08 | 2.42 | 0.57  | 1.60 | 0.05 |
| 27 | 10.00 | 0.90 | 2.70 | 0.78  | 1.05 | 0.05 |
| 28 | 9.34  | 1.22 | 2.75 | 3.16  | 1.29 | 0.05 |
| 29 | -6.83 | 0.52 | 3.63 | 0.32  | 0.55 | 0.07 |
| 30 | 2.18  | 1.13 | 2.76 | 0.90  | 0.99 | 0.05 |
| 31 | 6.82  | 0.95 | 2.74 | 2.84  | 0.83 | 0.05 |
| 32 | 9.88  | 0.63 | 2.72 | 1.69  | 0.77 | 0.05 |
| 33 | -3.33 | 1.88 | 2.65 | -0.78 | 3.01 | 0.05 |
| 34 | 1.99  | 0.60 | 3.73 | 0.66  | 0.00 | 0.07 |
| 35 | 0.54  | 0.35 | 2.48 | 0.42  | 0.28 | 0.05 |
| 36 | 8.37  | 1.06 | 2.40 | 0.59  | 0.57 | 0.05 |
| 37 | 1.25  | 0.39 | 2.75 | 0.81  | 0.36 | 0.05 |
| 39 | 0.94  | 0.61 | 2.58 | -0.06 | 1.12 | 0.05 |
| 40 | 1.96  | 0.47 | 2.77 | 1.28  | 0.40 | 0.05 |
| 42 | 1.63  | 0.79 | 2.13 | 0.03  | 0.74 | 0.04 |
| 43 | -1.38 | 1.32 | 2.68 | -0.11 | 0.37 | 0.05 |
| 44 | -0.47 | 0.83 | 2.34 | 0.70  | 1.11 | 0.04 |
| 45 | 0.59  | 1.71 | 2.67 | 0.09  | 2.00 | 0.05 |
| 46 | 9.89  | 1.47 | 2.48 | 0.58  | 0.52 | 0.05 |
| 48 | -1.87 | 1.51 | 3.67 | 0.20  | 0.37 | 0.07 |
| 49 | 4.12  | 0.68 | 2.22 | 1.13  | 1.07 | 0.04 |
| 50 | 13.09 | 2.65 | 2.84 | 1.76  | 1.13 | 0.05 |
| 51 | 2.65  | 1.26 | 2.16 | 0.88  | 0.93 | 0.04 |
| 52 | 1.51  | 0.93 | 2.79 | -0.18 | 0.67 | 0.05 |
| 53 | 5.00  | 0.86 | 2.31 | 0.43  | 0.75 | 0.04 |
| 54 | 14.74 | 1.60 | 2.40 |       |      |      |
| 55 | 0.28  | 0.49 | 1.98 | 1.08  | 0.68 | 0.04 |

**C<sub>α</sub>C<sub>β</sub> 900 (numbering on C<sub>α</sub>)**

| Residue# | $\Delta R, s^{-1}$ |       | $R_{DD/DD}, s^{-1}$ |            | $\Delta R, s^{-1}$ |            | $R_{DD/DD}, s^{-1}$ |            |
|----------|--------------------|-------|---------------------|------------|--------------------|------------|---------------------|------------|
|          | protonated         | error | protonated          | deuterated | error              | deuterated | error               | deuterated |
| 2        | 4.56               | 1.29  | 2.60                | 0.91       | 1.22               | 0.05       |                     |            |
| 3        | -8.49              | 4.62  | 2.65                | -1.97      | 1.58               | 0.05       |                     |            |
| 4        | 14.45              | 1.81  | 2.89                | 1.42       | 1.20               | 0.05       |                     |            |
| 5        | 15.05              | 2.09  | 2.78                | 4.47       | 0.52               | 0.05       |                     |            |
| 6        | 4.16               | 1.99  | 2.47                | -0.08      | 0.97               | 0.05       |                     |            |
| 7        | 5.75               | 2.48  | 2.43                | 0.56       | 0.72               | 0.05       |                     |            |



|    |       |      |      |       |      |      |
|----|-------|------|------|-------|------|------|
| 8  | -6.13 | 1.15 | 2.57 | 0.01  | 0.86 | 0.05 |
| 10 | 7.34  | 1.23 | 3.04 | 2.13  | 0.60 | 0.06 |
| 11 | 8.18  | 2.00 | 2.46 | 0.67  | 0.58 | 0.05 |
| 12 | 9.75  | 1.19 | 2.76 | 3.96  | 0.57 | 0.05 |
| 13 | 6.59  | 1.64 | 2.69 | 3.52  | 2.84 | 0.05 |
| 15 | 0.94  | 1.18 | 2.77 | 1.28  | 0.54 | 0.05 |
| 16 | 5.28  | 2.75 | 2.26 | 4.12  | 0.77 | 0.04 |
| 17 | 3.21  | 1.09 | 2.30 | -0.24 | 0.66 | 0.04 |
| 18 | 3.48  | 2.18 | 2.35 | 2.74  | 0.79 | 0.04 |
| 19 | 9.47  | 1.77 | 2.74 | 1.81  | 1.10 | 0.05 |
| 20 | -6.21 | 0.73 | 3.80 | -0.04 | 0.35 | 0.07 |
| 21 | -5.15 | 2.93 | 2.29 | 0.70  | 1.09 | 0.04 |
| 22 | -3.27 | 0.92 | 2.52 | -0.91 | 0.66 | 0.05 |
| 23 | -9.40 | 0.69 | 3.71 | -0.94 | 0.58 | 0.07 |
| 25 | 9.66  | 1.69 | 2.42 | 2.55  | 0.75 | 0.05 |
| 27 | 13.42 | 1.09 | 2.70 | 2.19  | 0.67 | 0.05 |
| 28 | 12.78 | 1.41 | 2.75 | 3.24  | 0.62 | 0.05 |
| 29 | -9.15 | 1.42 | 3.63 | 0.88  | 1.91 | 0.07 |
| 30 | 0.50  | 3.17 | 2.76 | -1.09 | 2.00 | 0.05 |
| 31 | 9.70  | 1.60 | 2.74 | 1.57  | 1.15 | 0.05 |
| 32 | 14.70 | 1.90 | 2.72 | 2.62  | 0.57 | 0.05 |
| 33 | -5.42 | 5.59 | 2.65 | -2.70 | 1.99 | 0.05 |
| 34 | 5.66  | 1.63 | 3.73 | -1.64 | 0.57 | 0.07 |
| 35 | 1.26  | 0.57 | 2.48 | 1.06  | 0.46 | 0.05 |
| 36 | 12.52 | 3.12 | 2.40 | 1.28  | 0.51 | 0.05 |
| 37 | 2.91  | 0.77 | 2.75 | 1.94  | 0.43 | 0.05 |
| 39 | -4.05 | 2.09 | 2.58 | -0.38 | 1.04 | 0.05 |
| 40 | 1.70  | 0.74 | 2.77 | 1.68  | 0.79 | 0.05 |
| 42 | -0.87 | 2.77 | 2.13 | 1.70  | 1.15 | 0.04 |
| 43 | 0.01  | 1.68 | 2.68 | 1.27  | 0.92 | 0.05 |
| 44 | -2.83 | 1.86 | 2.34 | 0.16  | 1.10 | 0.04 |
| 45 | -0.48 | 3.93 | 2.67 | -0.16 | 1.90 | 0.05 |
| 46 | 11.88 | 1.19 | 2.48 | 1.75  | 0.37 | 0.05 |
| 48 | -8.25 | 0.93 | 3.67 | -0.75 | 0.66 | 0.07 |
| 49 | 4.01  | 1.47 | 2.22 | -0.16 | 0.84 | 0.04 |
| 50 | 16.43 | 1.81 | 2.84 | 1.63  | 0.60 | 0.05 |
| 51 | 5.44  | 2.06 | 2.16 | 1.67  | 0.73 | 0.04 |
| 52 | 1.02  | 2.01 | 2.79 | -1.08 | 1.09 | 0.05 |
| 53 | 8.21  | 1.57 | 2.31 | 0.05  | 1.08 | 0.04 |
| 54 | 17.70 | 3.47 | 2.41 |       |      |      |
| 55 | 3.63  | 1.17 | 1.98 | 0.03  | 2.76 | 0.04 |

**J coupling constants (Hz) from C<sub>α</sub>C<sub>β</sub> data, 500MHz**

| Residue# | Protonated              |       | Deuterated              |       | Protonated               |       | Deuterated               |       |
|----------|-------------------------|-------|-------------------------|-------|--------------------------|-------|--------------------------|-------|
|          | $^1J(C_\beta C_\gamma)$ | error | $^1J(C_\beta C_\gamma)$ | error | $^2J(C_\alpha C_\gamma)$ | error | $^2J(C_\alpha C_\gamma)$ | error |
| 2        | 32.60                   | 0.33  | 33.24                   | 0.33  | 1.48                     | 0.33  | 1.36                     | 0.33  |
| 4        | 37.14                   | 0.97  | 32.97                   | 0.25  | -3.52                    | 0.97  | 0.96                     | 0.25  |
| 5        | 32.54                   | 0.35  | 33.08                   | 0.32  | 0.61                     | 0.35  | 0.33                     | 0.32  |
| 6        | 34.85                   | 0.44  | 35.55                   | 0.36  | 0.62                     | 0.44  | 0.35                     | 0.36  |
| 7        | 34.90                   | 0.45  | 34.82                   | 0.47  | 0.39                     | 0.45  | -0.69                    | 0.47  |
| 10       | 33.56                   | 0.58  | 33.06                   | 0.46  | -0.38                    | 0.58  | 0.32                     | 0.46  |
| 11       | 39.11                   | 0.39  | 38.57                   | 0.48  | 0.28                     | 0.39  | 1.41                     | 0.48  |
| 12       | 33.88                   | 0.37  | 34.08                   | 0.25  | -0.38                    | 0.37  | 0.75                     | 0.25  |
| 13       | 34.73                   | 0.55  | 35.58                   | 0.42  | -2.23                    | 0.55  | -1.86                    | 0.42  |
| 15       | 32.95                   | 0.24  | 33.33                   | 0.33  | 0.61                     | 0.24  | 0.69                     | 0.33  |
| 16       | 36.21                   | 0.35  | 36.93                   | 0.52  | 1.70                     | 0.35  | 1.74                     | 0.52  |
| 17       | 39.37                   | 0.65  | 38.04                   | 0.57  | -1.78                    | 0.65  | 0.97                     | 0.57  |
| 18       | 37.72                   | 0.63  | 39.11                   | 0.55  | -0.14                    | 0.63  | 0.69                     | 0.55  |
| 19       | 35.26                   | 0.57  | 33.59                   | 0.44  | -2.15                    | 0.57  | -0.07                    | 0.44  |
| 21       | 34.23                   | 0.63  | 35.05                   | 0.46  | 0.52                     | 0.63  | 0.78                     | 0.46  |
| 25       | 33.73                   | 0.46  | 35.37                   | 0.77  | 6.99                     | 0.46  | 7.10                     | 0.77  |
| 27       | 32.02                   | 0.38  | 33.86                   | 0.44  | 3.88                     | 0.38  | 2.79                     | 0.44  |
| 28       | 35.55                   | 0.90  | 32.51                   | 0.58  | -1.77                    | 0.90  | 1.69                     | 0.58  |
| 31       | 31.98                   | 0.31  | 33.23                   | 0.43  | 1.76                     | 0.31  | 0.38                     | 0.43  |
| 32       | 29.55                   | 0.26  | 32.75                   | 0.30  | 4.83                     | 0.26  | 2.62                     | 0.30  |
| 39       | 35.21                   | 0.20  | 35.07                   | 0.28  | 0.46                     | 0.20  | 0.08                     | 0.28  |
| 42       | 33.21                   | 0.51  | 35.60                   | 0.60  | 1.89                     | 0.51  | -1.21                    | 0.60  |
| 44       | 36.01                   | 0.42  | 37.80                   | 0.54  | 2.71                     | 0.42  | 1.59                     | 0.54  |
| 49       | 37.35                   | 0.39  | 37.05                   | 0.50  | 0.83                     | 0.39  | 1.17                     | 0.50  |
| 50       | 39.30                   | 1.35  | 34.50                   | 0.62  | -5.64                    | 1.35  | -1.17                    | 0.62  |
| 51       | 37.95                   | 0.54  | 39.07                   | 0.41  | 2.72                     | 0.54  | 3.32                     | 0.41  |
| 53       | 34.06                   | 0.33  | 38.73                   | 0.40  | -1.21                    | 0.33  | 3.36                     | 0.40  |
| 54       | 34.87                   | 0.79  | 38.10                   | 0.40  | 0.63                     | 0.79  | 4.70                     | 0.40  |
| 55       | 35.05                   | 0.40  | 35.46                   | 0.44  | 1.51                     | 0.40  | 0.39                     | 0.44  |

**J coupling constants (Hz) from C<sub>α</sub>C<sub>β</sub> data, 900MHz**

| Residue# | Protonated              |       | Deuterated              |       | Protonated               |       | Deuterated               |       |
|----------|-------------------------|-------|-------------------------|-------|--------------------------|-------|--------------------------|-------|
|          | $^1J(C_\beta C_\gamma)$ | error | $^1J(C_\beta C_\gamma)$ | error | $^2J(C_\alpha C_\gamma)$ | error | $^2J(C_\alpha C_\gamma)$ | error |
| 2        | 32.76                   | 0.41  | 33.02                   | 0.40  | 0.53                     | 0.41  | 1.10                     | 0.40  |
| 4        | 34.70                   | 0.63  | 33.22                   | 0.41  | -0.36                    | 0.63  | 0.98                     | 0.41  |
| 5        | 32.25                   | 0.75  | 33.82                   | 0.12  | 0.76                     | 0.75  | 0.78                     | 0.12  |
| 6        | 35.14                   | 0.66  | 35.38                   | 0.36  | 0.28                     | 0.66  | 0.79                     | 0.36  |

|    |       |      |       |      |       |      |       |      |
|----|-------|------|-------|------|-------|------|-------|------|
| 7  | 35.05 | 0.74 | 35.17 | 0.47 | 0.79  | 0.74 | 0.86  | 0.47 |
| 10 | 32.73 | 0.52 | 32.68 | 0.12 | 0.70  | 0.52 | 0.03  | 0.12 |
| 11 | 37.75 | 0.58 | 38.76 | 0.18 | 1.76  | 0.58 | 2.00  | 0.18 |
| 12 | 33.10 | 0.37 | 33.77 | 0.16 | 0.68  | 0.37 | 1.58  | 0.16 |
| 13 | 33.11 | 0.65 | 39.46 | 1.31 | -0.19 | 0.65 | -0.50 | 1.31 |
| 15 | 33.08 | 0.36 | 33.62 | 0.11 | 0.01  | 0.36 | -0.23 | 0.11 |
| 16 | 35.25 | 0.88 | 38.09 | 0.28 | 1.50  | 0.88 | 2.14  | 0.28 |
| 17 | 37.77 | 0.39 | 38.55 | 0.25 | 0.72  | 0.39 | 1.97  | 0.25 |
| 18 | 35.86 | 0.57 | 40.18 | 0.31 | 0.21  | 0.57 | 2.16  | 0.31 |
| 19 | 33.28 | 0.65 | 33.58 | 0.39 | -0.14 | 0.65 | 0.33  | 0.39 |
| 21 | 34.64 | 0.94 | 34.67 | 0.31 | -0.57 | 0.94 | -0.69 | 0.31 |
| 25 | 37.16 | 0.51 | 37.36 | 0.15 | 4.71  | 0.51 | 4.51  | 0.15 |
| 27 | 32.48 | 0.48 | 33.93 | 0.13 | 3.41  | 0.48 | 1.88  | 0.13 |
| 28 | 33.45 | 0.53 | 32.08 | 0.18 | 0.35  | 0.53 | 0.71  | 0.18 |
| 31 | 31.74 | 0.72 | 31.86 | 0.39 | 1.06  | 0.72 | 0.39  | 0.39 |
| 32 | 29.18 | 0.56 | 33.79 | 0.11 | 5.47  | 0.56 | 1.43  | 0.11 |
| 39 | 35.45 | 0.66 | 35.19 | 0.29 | 0.20  | 0.66 | 0.55  | 0.29 |
| 42 | 35.07 | 0.82 | 35.10 | 0.30 | -0.34 | 0.82 | 0.37  | 0.30 |
| 44 | 39.15 | 0.76 | 35.48 | 0.42 | 0.36  | 0.76 | 0.57  | 0.42 |
| 49 | 34.92 | 0.47 | 37.23 | 0.28 | 1.56  | 0.47 | 3.03  | 0.28 |
| 50 | 33.99 | 0.89 | 33.65 | 0.18 | -0.92 | 0.89 | -0.46 | 0.18 |
| 51 | 37.56 | 0.51 | 39.15 | 0.17 | 2.68  | 0.51 | 3.95  | 0.17 |
| 53 | 33.05 | 0.50 | 38.78 | 0.37 | 0.03  | 0.50 | 4.26  | 0.37 |
| 54 | 32.86 | 0.76 |       |      | 1.77  | 0.76 |       |      |
| 55 | 31.71 | 0.40 | 43.00 | 3.06 | 0.87  | 0.40 | 1.90  | 3.06 |

**SI6. Correlation plots of  $\Delta R$  rates for the protonated versus deuterated proteins at 500 MHz .**

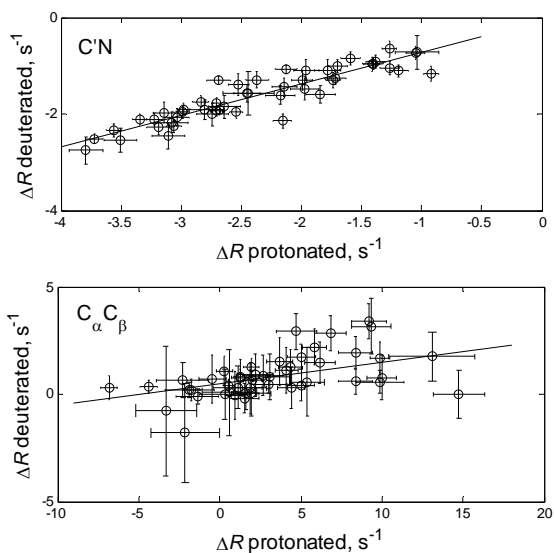

**Figure SI3.** Correlation plots of  $\Delta R$  for protonated and deuterated GB3 at 500 MHz field strength and 25 °C for the C'N (top) and C<sub>α</sub>C<sub>β</sub> experiment (bottom).

**SI7. Correlation plot of differences in J-coupling constants between protonated and deuterated proteins at two fields.**

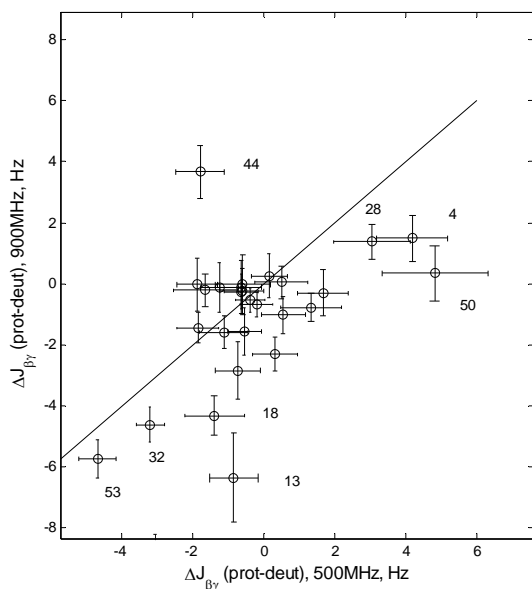

**Figure SI4.** Correlation plot of the difference in J<sub>βγ</sub> between protonated and deuterated proteins,  $\Delta J_{\beta\gamma}$ , at 500 and 900 MHz. The overall offset suggests residual systematic errors between the two spectrometers.

**SI8. Fits for the  $^{13}\text{C}_\alpha\text{--}^{13}\text{C}_\beta$  experiment at 500 MHz for the protonated data with J-coupling constants values averaged between protonated and deuterated proteins.**

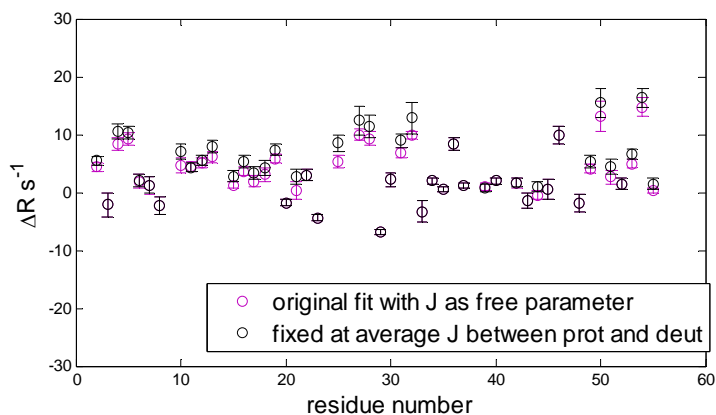

**Figure SI5.**  $\Delta R$  versus residue number for 500 MHz data on protonated GB3 at 25 °C with  $J_{\beta\gamma}$ - and  $J_{\alpha\gamma}$ -coupling constants as free fitting parameters according to Eq.12 (purple) and with the values fixed at the weighted average values originating from the independent fits for the protonated and deuterated proteins (black). The average J-coupling constants were calculated using the values listed in SI5.

Loth K, Pelupessy P, Bodenhausen G (2005) Chemical shift anisotropy tensors of carbonyl, nitrogen, and amide proton nuclei in proteins through cross-correlated relaxation in NMR spectroscopy. *J Am Chem Soc* 127:6062-6068
